# Supplementary material for: Energy landscape of Au13: a global view of structure transformation
Source: Royal Society of Chemistry journal article supplement (doi:10.1039/c9cp06463j), 2020-01-01
Supplement: c9cp06463j2.pdf [file c9cp06463j2.pdf]

Supplementary Materials for

## **Energy Landscape of Au<sub>13</sub>: A global view of structure transformation**

Xiao-Tian Li,<sup>1,#</sup> Shao-Gang Xu,<sup>1,#</sup> Xiao-bao Yang,<sup>1,2</sup> and Yu-Jun Zhao<sup>1,2,a)</sup>

<sup>1</sup>*Department of Physics and School of Materials Science and Engineering, South China University of Technology, Guangzhou, Guangdong 510640, China*

<sup>2</sup>*Key Laboratory of Advanced Energy Storage Materials of Guangdong Province, South China University of Technology, Guangzhou, Guangdong 510640, China*

#X.T.L. and S.G.X. contributed equally to this work.

<sup>a)</sup>Corresponding author. Tel: +86-20-87110426; fax: +86-20-87112837;

E-mail: [zhaoyj@scut.edu.cn](mailto:zhaoyj@scut.edu.cn).

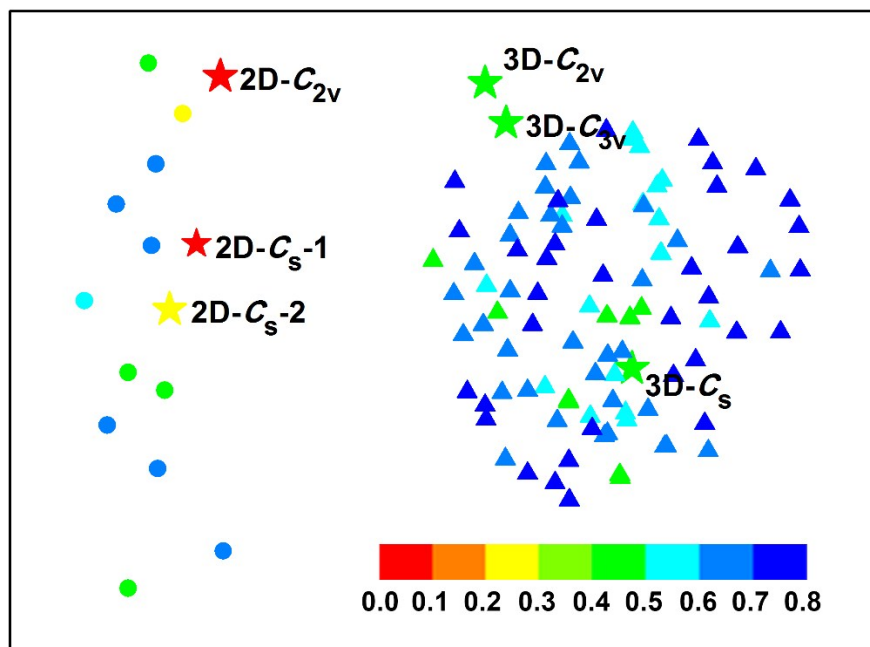

**Fig. S1** 2D landscape of  $\text{Au}_{13}$  cluster. Each point here represents a local minimum configuration, whose position on the 2D map is determined by minimizing  $\sum_{p < q} (d_{2D,pq} - d_{\text{dist},pq})^2$ . The circular and triangular points represent 2D and 3D configurations respectively, while the stars represent the six lowlying configurations particularly, as referred in the maintext (see Fig. 2). The colors stand for the energies of the configurations, as indicated by the color bar.

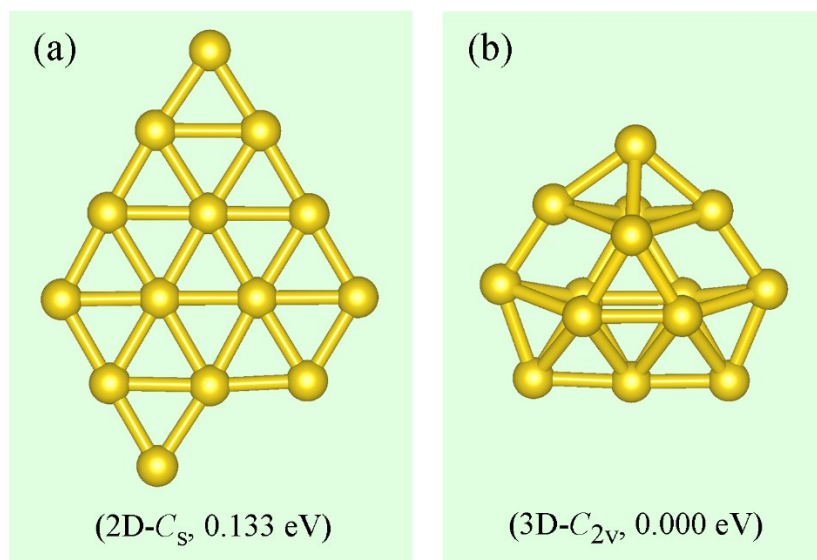

**Fig. S2** Low energy configurations of  $Au_{14}$  with (a) two-dimensional (2D) structure and (b) 3D structure. The energies are with respect to the global minimum 3D- $C_{2v}$ .

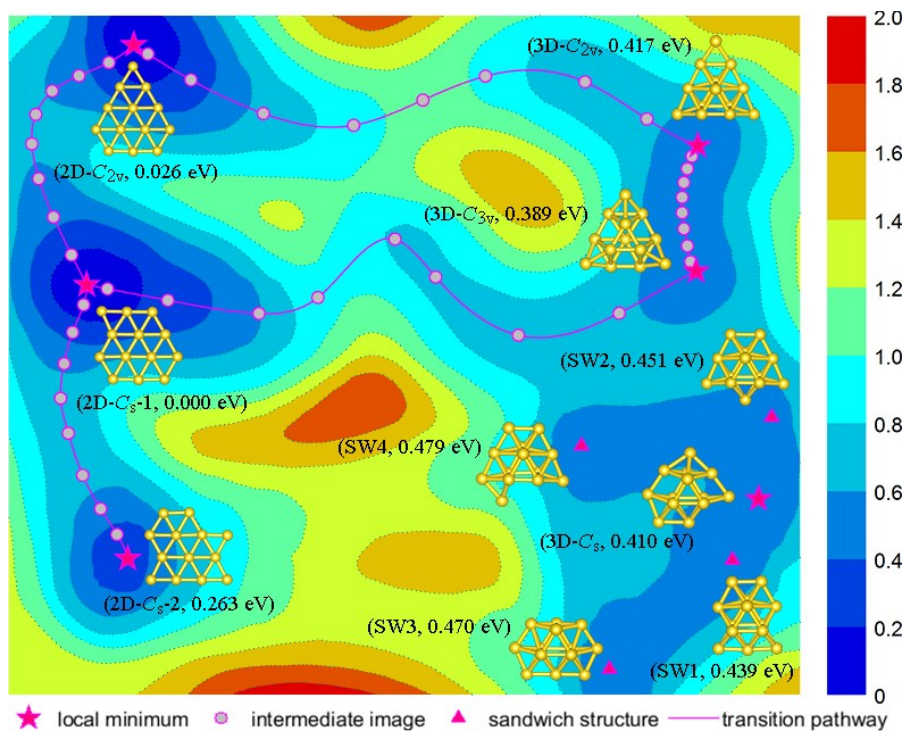

**Fig. S3** Artificial 2D contour map showing the detailed landscape of  $\text{Au}_{13}$  around  $3\text{D-C}_s$ . The triangles represent a series of sandwich (SW) configurations with different interlayer structures, whose surrounding landscape was obtained by the distance-barrier correlation and interpolation, while the rest of the map is sketched as Fig. 2. Obviously,  $3\text{D-C}_s$  and the SW configurations have relatively similar structures and form a corrugated basin on the potential energy surface, leading to the flexuosity of pathways from other local minima towards  $3\text{D-C}_s$ .

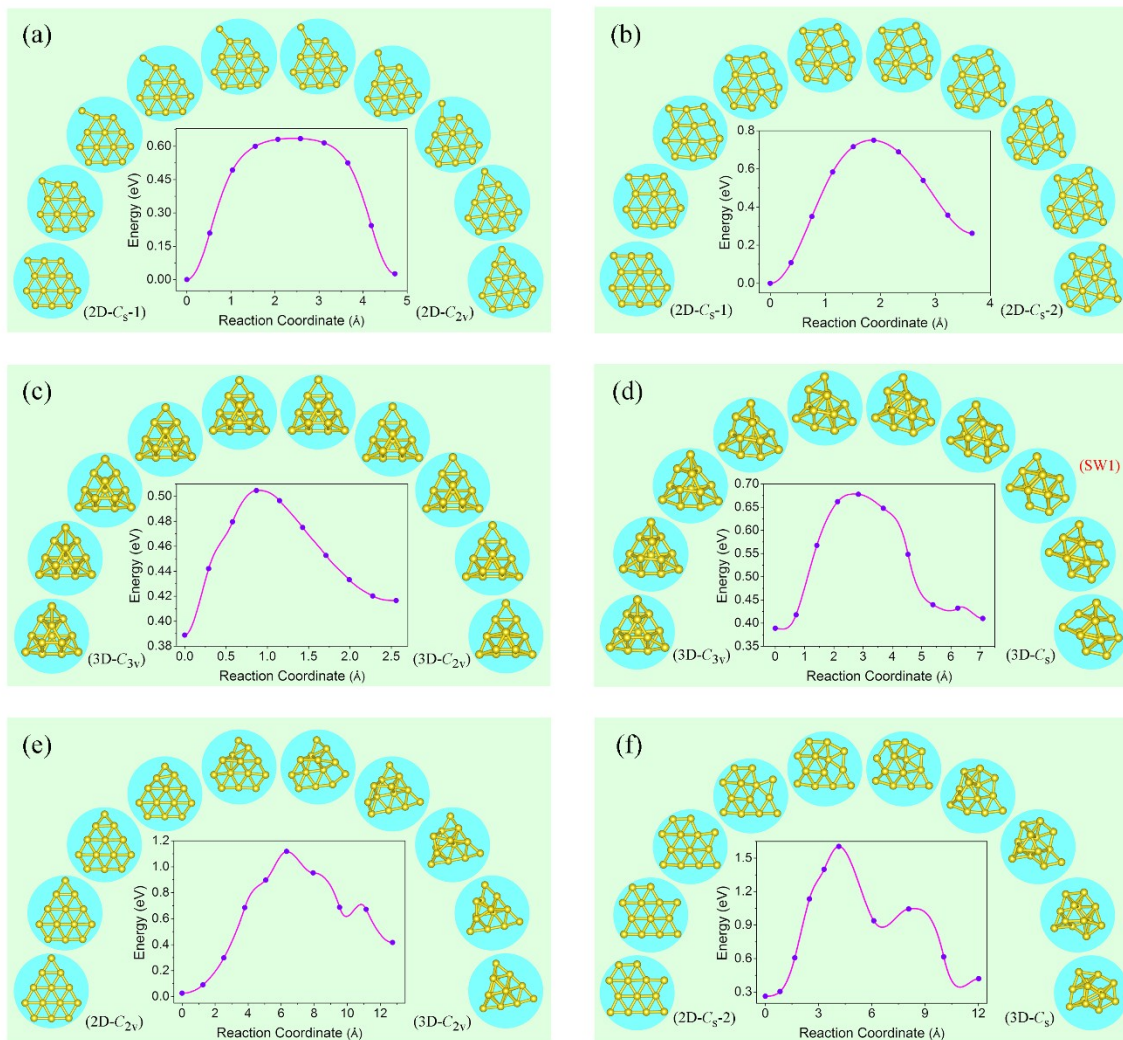

**Fig. S4** Detailed pathways between the representative configurations in Fig. 2, with selected images in the transition. Note that the pathway between  $3D-C_{3v}$  and  $3D-C_s$  in (d) passes through SW1, leading to two irregular images alongside the path in Fig. 2 (refer to the position of SW1 on the PES in Fig. S3).
